# Supplementary material
Source: Springer Nature journal article supplement (https://www.springerprofessional.de/resource/supplementary/13638_2014_963_MOESM29_ESM.pdf/11898886)

# Delivery Probability

- Without mitigation of misbehaving nodes
- With mitigation of misbehaving nodes

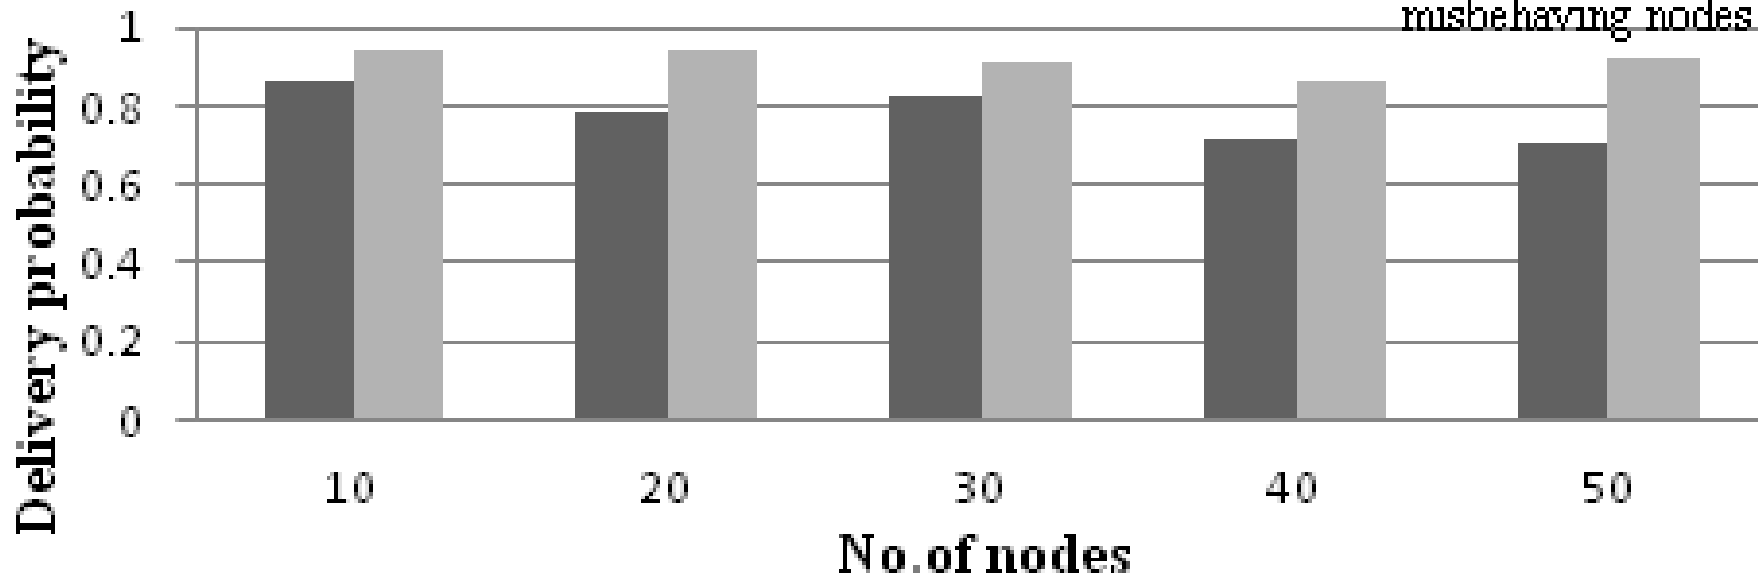

Supplement: MOESM29 [file 11898886]
